# Supplementary material
Source: publisher figshare collection journal article supplement (https://acs.figshare.com/ndownloader/files/3758224)
Supplement: Supplementary file 1 [file 3758224]

 
data_exp_5442 
 
_audit_creation_method            SHELXL-97 
_chemical_name_systematic 
; 
 ? 
; 
_chemical_name_common             ? 
_chemical_melting_point           ? 
_chemical_formula_moiety          ? 
_chemical_formula_sum 
 'C20 H21 N3 O9' 
_chemical_formula_weight          447.40 
 
loop_ 
 _atom_type_symbol 
 _atom_type_description 
 _atom_type_scat_dispersion_real 
 _atom_type_scat_dispersion_imag 
 _atom_type_scat_source 
 'C'  'C'   0.0181   0.0091 
 'International Tables Vol C Tables 4.2.6.8 and 6.1.1.4' 
 'H'  'H'   0.0000   0.0000 
 'International Tables Vol C Tables 4.2.6.8 and 6.1.1.4' 
 'N'  'N'   0.0311   0.0180 
 'International Tables Vol C Tables 4.2.6.8 and 6.1.1.4' 
 'O'  'O'   0.0492   0.0322 
 'International Tables Vol C Tables 4.2.6.8 and 6.1.1.4' 
 
_symmetry_cell_setting            triclinic 
_symmetry_space_group_name_H-M    'P -1' 
 
loop_ 
 _symmetry_equiv_pos_as_xyz 
 'x, y, z' 
 '-x, -y, -z' 
 
_cell_length_a                    10.2719(9) 
_cell_length_b                    10.3488(6) 
_cell_length_c                    10.8229(9) 
_cell_angle_alpha                 107.583(6) 
_cell_angle_beta                  100.840(7) 
_cell_angle_gamma                 109.819(7) 
_cell_volume                      976.16(13) 
_cell_formula_units_Z             2 
_cell_measurement_temperature     150.00(10) 
_cell_measurement_reflns_used     2298 
_cell_measurement_theta_min       4.5262 
_cell_measurement_theta_max       65.3850
 
_exptl_crystal_description        noodle 
_exptl_crystal_colour             colourless
_exptl_crystal_size_max           0.10 
_exptl_crystal_size_mid           0.08 
_exptl_crystal_size_min           0.04 
_exptl_crystal_density_meas       ? 
_exptl_crystal_density_diffrn     1.522 
_exptl_crystal_density_method     'not measured' 
_exptl_crystal_F_000              468 
_exptl_absorpt_coefficient_mu     1.038 
_exptl_absorpt_correction_type    'multi-scan' 
_exptl_absorpt_correction_T_min   0.9033 
_exptl_absorpt_correction_T_max   0.9597 
_exptl_absorpt_process_details    ? 
 
_exptl_special_details 
; 
 ? 
; 
 
_diffrn_ambient_temperature       150.00(10) 
_diffrn_radiation_wavelength      1.54184 
_diffrn_radiation_type            CuK\a 
_diffrn_radiation_source          'fine-focus sealed tube' 
_diffrn_radiation_monochromator   graphite 
_diffrn_measurement_device_type   'Xcalibur, Atlas, Gemini ultra' 
_diffrn_measurement_method        '\w scans' 
_diffrn_detector_area_resol_mean  10.5058 
_diffrn_standards_number          6098 
_diffrn_standards_interval_count  ? 
_diffrn_standards_interval_time   ? 
_diffrn_standards_decay_%         ? 
_diffrn_reflns_number             6051 
_diffrn_reflns_av_R_equivalents   0.0312 
_diffrn_reflns_av_sigmaI/netI     0.0422 
_diffrn_reflns_limit_h_min        -8 
_diffrn_reflns_limit_h_max        11 
_diffrn_reflns_limit_k_min        -12 
_diffrn_reflns_limit_k_max        11 
_diffrn_reflns_limit_l_min        -12 
_diffrn_reflns_limit_l_max        11 
_diffrn_reflns_theta_min          4.53 
_diffrn_reflns_theta_max          63.61 
_reflns_number_total              3130 
_reflns_number_gt                 2444 
_reflns_threshold_expression      >2sigma(I) 
 
_computing_data_collection        ? 
_computing_cell_refinement        ? 
_computing_data_reduction         ? 
_computing_structure_solution     'SHELXS-97 (Sheldrick, 1990)' 
_computing_structure_refinement   'SHELXL-97 (Sheldrick, 1997)' 
_computing_molecular_graphics     ? 
_computing_publication_material   ? 
 
_refine_special_details 
; 
 Refinement of F^2^ against ALL reflections.  The weighted R-factor wR and 
 goodness of fit S are based on F^2^, conventional R-factors R are based 
 on F, with F set to zero for negative F^2^. The threshold expression of 
 F^2^ > 2sigma(F^2^) is used only for calculating R-factors(gt) etc. and is 
 not relevant to the choice of reflections for refinement.  R-factors based 
 on F^2^ are statistically about twice as large as those based on F, and R- 
 factors based on ALL data will be even larger. 
; 
 
_refine_ls_structure_factor_coef  Fsqd  
_refine_ls_matrix_type            full 
_refine_ls_weighting_scheme       calc  
_refine_ls_weighting_details 
 'calc w=1/[\s^2^(Fo^2^)+(0.0676P)^2^+0.5780P] where P=(Fo^2^+2Fc^2^)/3' 
_atom_sites_solution_primary      direct 
_atom_sites_solution_secondary    difmap 
_atom_sites_solution_hydrogens    geom 
_refine_ls_hydrogen_treatment     mixed 
_refine_ls_extinction_method      none 
_refine_ls_extinction_coef        ? 
_refine_ls_number_reflns          3130 
_refine_ls_number_parameters      316 
_refine_ls_number_restraints      2 
_refine_ls_R_factor_all           0.0661 
_refine_ls_R_factor_gt            0.0496 
_refine_ls_wR_factor_ref          0.1365 
_refine_ls_wR_factor_gt           0.1232 
_refine_ls_goodness_of_fit_ref    1.034 
_refine_ls_restrained_S_all       1.034 
_refine_ls_shift/su_max           0.000 
_refine_ls_shift/su_mean          0.000 
 
loop_ 
 _atom_site_label 
 _atom_site_type_symbol 
 _atom_site_fract_x 
 _atom_site_fract_y 
 _atom_site_fract_z 
 _atom_site_U_iso_or_equiv 
 _atom_site_adp_type 
 _atom_site_occupancy 
 _atom_site_symmetry_multiplicity 
 _atom_site_calc_flag 
 _atom_site_refinement_flags 
 _atom_site_disorder_assembly 
 _atom_site_disorder_group 
O2 O 0.3399(2) 0.2988(2) 0.8818(2) 0.0403(5) Uani 1 1 d . . . 
N1 N -0.2554(3) -0.0457(3) 0.7855(2) 0.0300(5) Uani 1 1 d . . . 
O3 O 0.4926(2) 0.6907(2) 0.7646(2) 0.0411(5) Uani 1 1 d . . . 
O1 O 0.2483(2) 0.4820(2) 1.2340(2) 0.0438(5) Uani 1 1 d . . . 
N3 N 0.3979(3) 0.4897(2) 0.8128(2) 0.0304(5) Uani 1 1 d . . . 
C18 C 0.0311(3) 0.2454(3) 1.1091(3) 0.0275(6) Uani 1 1 d . . . 
C19 C -0.1706(3) 0.0321(3) 0.9257(3) 0.0243(6) Uani 1 1 d . . . 
N2 N 0.1472(3) 0.3790(2) 0.9989(3) 0.0356(6) Uani 1 1 d . . . 
C21 C -0.2109(3) -0.0177(3) 1.0248(3) 0.0283(6) Uani 1 1 d . . . 
H21 H -0.2928 -0.1070 0.9979 0.034 Uiso 1 1 calc R . . 
C22 C -0.0092(3) 0.1965(3) 1.2080(3) 0.0309(6) Uani 1 1 d . . . 
H22 H 0.0438 0.2512 1.3006 0.037 Uiso 1 1 calc R . . 
C23 C -0.0469(3) 0.1661(3) 0.9708(3) 0.0258(6) Uani 1 1 d . . . 
C24 C 0.3325(3) 0.4142(3) 0.8853(3) 0.0317(6) Uani 1 1 d . . . 
C25 C -0.1307(3) 0.0638(3) 1.1632(3) 0.0304(6) Uani 1 1 d . . . 
H25 H -0.1600 0.0276 1.2269 0.036 Uiso 1 1 calc R . . 
C26 C 0.4171(3) 0.6323(3) 0.8231(3) 0.0310(6) Uani 1 1 d . . . 
C27 C 0.3415(3) 0.7036(3) 0.9083(3) 0.0355(7) Uani 1 1 d . . . 
H27A H 0.3065 0.7610 0.8657 0.043 Uiso 1 1 calc R . . 
H27B H 0.4116 0.7727 0.9980 0.043 Uiso 1 1 calc R . . 
C28 C 0.1545(3) 0.3821(3) 1.1261(3) 0.0323(6) Uani 1 1 d . . . 
C29 C 0.0230(3) 0.2465(3) 0.8899(3) 0.0316(6) Uani 1 1 d . . . 
H29A H 0.0559 0.1862 0.8269 0.038 Uiso 1 1 calc R . . 
H29B H -0.0434 0.2745 0.8391 0.038 Uiso 1 1 calc R . . 
C30 C 0.2602(4) 0.4894(3) 0.9758(4) 0.0405(7) Uani 1 1 d . . . 
H30 H 0.3359 0.5533 1.0653 0.049 Uiso 1 1 calc R . . 
C31 C 0.2130(4) 0.5909(4) 0.9257(4) 0.0465(8) Uani 1 1 d . . . 
H31A H 0.1762 0.6433 0.9907 0.056 Uiso 1 1 calc R . . 
H31B H 0.1347 0.5325 0.8387 0.056 Uiso 1 1 calc R . . 
H1 H -0.322(4) -0.137(4) 0.767(3) 0.040(9) Uiso 1 1 d . . . 
H2 H -0.202(5) -0.048(4) 0.727(4) 0.070(13) Uiso 1 1 d . . . 
H3 H 0.443(4) 0.439(4) 0.759(4) 0.065(11) Uiso 1 1 d . . . 
O5A O 0.5125(2) 0.71281(18) 1.37202(19) 0.0275(4) Uani 1 1 d . . . 
H5A H 0.4266 0.6908 1.3334 0.041 Uiso 1 1 calc R . . 
O4A O 0.3918(2) 0.8716(2) 1.2749(2) 0.0316(5) Uani 1 1 d . . . 
O7A O 1.0017(2) 1.3628(2) 1.5648(2) 0.0370(5) Uani 1 1 d . . . 
H7A H 1.0495 1.4440 1.5642 0.056 Uiso 1 1 calc R . . 
O6A O 0.8052(2) 0.8376(2) 1.5190(2) 0.0320(5) Uani 1 1 d . . . 
H6A H 0.7405 0.7595 1.5107 0.048 Uiso 1 1 calc R . . 
O8A O 0.8241(2) 1.3803(2) 1.4254(2) 0.0365(5) Uani 1 1 d . . . 
C6A C 0.7435(3) 0.9195(3) 1.4732(3) 0.0237(6) Uani 1 1 d . . . 
C7A C 0.5955(3) 0.8586(3) 1.3984(3) 0.0234(6) Uani 1 1 d . . . 
C8A C 0.6253(3) 1.0929(3) 1.3808(3) 0.0263(6) Uani 1 1 d . . . 
H8A H 0.5867 1.1512 1.3500 0.032 Uiso 1 1 calc R . . 
C9A C 0.7724(3) 1.1534(3) 1.4575(3) 0.0249(6) Uani 1 1 d . . . 
C10A C 0.5368(3) 0.9449(3) 1.3508(3) 0.0251(6) Uani 1 1 d . . . 
C11A C 0.8323(3) 1.0669(3) 1.5029(3) 0.0246(6) Uani 1 1 d . . . 
H11A H 0.9311 1.1081 1.5526 0.030 Uiso 1 1 calc R . . 
C12A C 0.8684(3) 1.3078(3) 1.4827(3) 0.0265(6) Uani 1 1 d . . . 
H4A H 0.356(5) 0.944(4) 1.270(4) 0.071(12) Uiso 1 1 d . . . 
O10 O 0.3439(2) 0.4301(3) 1.4707(2) 0.0473(6) Uani 1 1 d D . . 
H10A H 0.307(5) 0.442(6) 1.392(3) 0.097(16) Uiso 1 1 d D . . 
H10B H 0.337(12) 0.520(7) 1.517(11) 0.26(5) Uiso 1 1 d D . . 
 
loop_ 
 _atom_site_aniso_label 
 _atom_site_aniso_U_11 
 _atom_site_aniso_U_22 
 _atom_site_aniso_U_33 
 _atom_site_aniso_U_23 
 _atom_site_aniso_U_13 
 _atom_site_aniso_U_12 
O2 0.0501(13) 0.0332(11) 0.0550(14) 0.0259(10) 0.0272(11) 0.0245(10) 
N1 0.0306(14) 0.0283(13) 0.0254(12) 0.0108(10) 0.0029(11) 0.0092(11) 
O3 0.0480(13) 0.0354(11) 0.0409(12) 0.0222(10) 0.0168(11) 0.0113(10) 
O1 0.0336(12) 0.0352(11) 0.0435(13) 0.0126(10) -0.0016(10) 0.0029(10) 
N3 0.0348(14) 0.0253(11) 0.0320(13) 0.0120(10) 0.0122(11) 0.0123(11) 
C18 0.0241(14) 0.0262(13) 0.0322(15) 0.0102(11) 0.0061(12) 0.0133(12) 
C19 0.0241(14) 0.0245(13) 0.0261(14) 0.0094(11) 0.0053(11) 0.0144(11) 
N2 0.0308(14) 0.0286(12) 0.0452(15) 0.0142(11) 0.0160(12) 0.0084(11) 
C21 0.0289(15) 0.0257(13) 0.0331(15) 0.0129(11) 0.0109(12) 0.0131(12) 
C22 0.0352(16) 0.0338(15) 0.0263(14) 0.0112(12) 0.0088(12) 0.0188(13) 
C23 0.0263(14) 0.0292(14) 0.0302(14) 0.0150(11) 0.0113(12) 0.0173(12) 
C24 0.0282(15) 0.0269(14) 0.0411(16) 0.0163(12) 0.0116(13) 0.0102(12) 
C25 0.0367(16) 0.0336(15) 0.0303(15) 0.0173(12) 0.0143(13) 0.0197(13) 
C26 0.0320(15) 0.0256(14) 0.0296(15) 0.0123(12) 0.0023(13) 0.0084(12) 
C27 0.0419(18) 0.0274(14) 0.0373(16) 0.0137(12) 0.0092(14) 0.0158(13) 
C28 0.0261(15) 0.0306(15) 0.0382(17) 0.0115(13) 0.0072(13) 0.0132(13) 
C29 0.0334(16) 0.0304(14) 0.0318(15) 0.0132(12) 0.0127(13) 0.0125(13) 
C30 0.0402(18) 0.0326(16) 0.055(2) 0.0212(14) 0.0246(16) 0.0147(14) 
C31 0.057(2) 0.0429(17) 0.058(2) 0.0261(16) 0.0304(18) 0.0311(17) 
O5A 0.0238(10) 0.0245(9) 0.0311(10) 0.0120(8) 0.0056(8) 0.0076(8) 
O4A 0.0221(10) 0.0273(10) 0.0392(11) 0.0150(9) 0.0006(8) 0.0067(8) 
O7A 0.0274(11) 0.0273(10) 0.0430(12) 0.0133(9) 0.0011(9) 0.0024(9) 
O6A 0.0278(10) 0.0290(10) 0.0377(11) 0.0142(9) 0.0037(9) 0.0131(8) 
O8A 0.0306(11) 0.0286(10) 0.0449(12) 0.0172(9) 0.0042(9) 0.0085(9) 
C6A 0.0249(14) 0.0260(13) 0.0219(13) 0.0084(10) 0.0073(11) 0.0136(11) 
C7A 0.0252(14) 0.0208(12) 0.0218(13) 0.0066(10) 0.0081(11) 0.0085(11) 
C8A 0.0269(15) 0.0268(14) 0.0272(14) 0.0125(11) 0.0080(12) 0.0125(12) 
C9A 0.0252(14) 0.0247(13) 0.0243(13) 0.0090(10) 0.0094(11) 0.0097(11) 
C10A 0.0230(14) 0.0283(13) 0.0218(13) 0.0096(11) 0.0060(11) 0.0092(11) 
C11A 0.0202(13) 0.0278(13) 0.0207(13) 0.0070(10) 0.0029(11) 0.0087(11) 
C12A 0.0262(14) 0.0256(13) 0.0261(14) 0.0090(11) 0.0075(12) 0.0107(12) 
O10 0.0368(13) 0.0598(15) 0.0433(13) 0.0254(12) 0.0084(11) 0.0165(11) 
 
_geom_special_details 
; 
 All esds (except the esd in the dihedral angle between two l.s. planes) 
 are estimated using the full covariance matrix.  The cell esds are taken 
 into account individually in the estimation of esds in distances, angles 
 and torsion angles; correlations between esds in cell parameters are only 
 used when they are defined by crystal symmetry.  An approximate (isotropic) 
 treatment of cell esds is used for estimating esds involving l.s. planes. 
; 
 
loop_ 
 _geom_bond_atom_site_label_1 
 _geom_bond_atom_site_label_2 
 _geom_bond_distance 
 _geom_bond_site_symmetry_2 
 _geom_bond_publ_flag 
O2 C24 1.212(3) . ? 
N1 C19 1.414(3) . ? 
N1 H1 0.89(4) . ? 
N1 H2 0.91(4) . ? 
O3 C26 1.211(3) . ? 
O1 C28 1.238(4) . ? 
N3 C24 1.375(4) . ? 
N3 C26 1.386(3) . ? 
N3 H3 0.96(4) . ? 
C18 C23 1.384(4) . ? 
C18 C22 1.388(4) . ? 
C18 C28 1.477(4) . ? 
C19 C23 1.392(4) . ? 
C19 C21 1.394(4) . ? 
N2 C28 1.354(4) . ? 
N2 C30 1.448(4) . ? 
N2 C29 1.473(4) . ? 
C21 C25 1.391(4) . ? 
C21 H21 0.9300 . ? 
C22 C25 1.374(4) . ? 
C22 H22 0.9300 . ? 
C23 C29 1.499(4) . ? 
C24 C30 1.523(4) . ? 
C25 H25 0.9300 . ? 
C26 C27 1.498(4) . ? 
C27 C31 1.524(4) . ? 
C27 H27A 0.9700 . ? 
C27 H27B 0.9700 . ? 
C29 H29A 0.9700 . ? 
C29 H29B 0.9700 . ? 
C30 C31 1.492(4) . ? 
C30 H30 0.9800 . ? 
C31 H31A 0.9700 . ? 
C31 H31B 0.9700 . ? 
O5A C7A 1.364(3) . ? 
O5A H5A 0.8200 . ? 
O4A C10A 1.366(3) . ? 
O4A H4A 0.94(4) . ? 
O7A C12A 1.302(3) . ? 
O7A H7A 0.8200 . ? 
O6A C6A 1.366(3) . ? 
O6A H6A 0.8200 . ? 
O8A C12A 1.250(3) . ? 
C6A C11A 1.383(4) . ? 
C6A C7A 1.394(4) . ? 
C7A C10A 1.397(4) . ? 
C8A C10A 1.387(4) . ? 
C8A C9A 1.392(4) . ? 
C8A H8A 0.9300 . ? 
C9A C11A 1.395(4) . ? 
C9A C12A 1.472(4) . ? 
C11A H11A 0.9300 . ? 
O10 H10A 0.93(2) . ? 
O10 H10B 0.95(2) . ? 
 
loop_ 
 _geom_angle_atom_site_label_1 
 _geom_angle_atom_site_label_2 
 _geom_angle_atom_site_label_3 
 _geom_angle 
 _geom_angle_site_symmetry_1 
 _geom_angle_site_symmetry_3 
 _geom_angle_publ_flag 
C19 N1 H1 113(2) . . ? 
C19 N1 H2 114(3) . . ? 
H1 N1 H2 112(3) . . ? 
C24 N3 C26 127.1(2) . . ? 
C24 N3 H3 113(2) . . ? 
C26 N3 H3 119(2) . . ? 
C23 C18 C22 122.3(3) . . ? 
C23 C18 C28 108.5(2) . . ? 
C22 C18 C28 129.3(3) . . ? 
C23 C19 C21 117.4(2) . . ? 
C23 C19 N1 120.9(2) . . ? 
C21 C19 N1 121.7(3) . . ? 
C28 N2 C30 121.7(3) . . ? 
C28 N2 C29 113.2(2) . . ? 
C30 N2 C29 124.8(2) . . ? 
C25 C21 C19 121.1(3) . . ? 
C25 C21 H21 119.4 . . ? 
C19 C21 H21 119.4 . . ? 
C25 C22 C18 117.1(3) . . ? 
C25 C22 H22 121.4 . . ? 
C18 C22 H22 121.4 . . ? 
C18 C23 C19 120.5(2) . . ? 
C18 C23 C29 109.9(2) . . ? 
C19 C23 C29 129.6(2) . . ? 
O2 C24 N3 121.0(2) . . ? 
O2 C24 C30 122.8(3) . . ? 
N3 C24 C30 116.0(2) . . ? 
C22 C25 C21 121.6(3) . . ? 
C22 C25 H25 119.2 . . ? 
C21 C25 H25 119.2 . . ? 
O3 C26 N3 119.0(3) . . ? 
O3 C26 C27 124.5(2) . . ? 
N3 C26 C27 116.4(2) . . ? 
C26 C27 C31 113.2(2) . . ? 
C26 C27 H27A 108.9 . . ? 
C31 C27 H27A 108.9 . . ? 
C26 C27 H27B 108.9 . . ? 
C31 C27 H27B 108.9 . . ? 
H27A C27 H27B 107.8 . . ? 
O1 C28 N2 125.3(3) . . ? 
O1 C28 C18 127.9(3) . . ? 
N2 C28 C18 106.7(2) . . ? 
N2 C29 C23 101.7(2) . . ? 
N2 C29 H29A 111.4 . . ? 
C23 C29 H29A 111.4 . . ? 
N2 C29 H29B 111.4 . . ? 
C23 C29 H29B 111.4 . . ? 
H29A C29 H29B 109.3 . . ? 
N2 C30 C31 114.9(3) . . ? 
N2 C30 C24 110.3(2) . . ? 
C31 C30 C24 112.5(3) . . ? 
N2 C30 H30 106.2 . . ? 
C31 C30 H30 106.2 . . ? 
C24 C30 H30 106.2 . . ? 
C30 C31 C27 110.0(3) . . ? 
C30 C31 H31A 109.7 . . ? 
C27 C31 H31A 109.7 . . ? 
C30 C31 H31B 109.7 . . ? 
C27 C31 H31B 109.7 . . ? 
H31A C31 H31B 108.2 . . ? 
C7A O5A H5A 109.5 . . ? 
C10A O4A H4A 108(3) . . ? 
C12A O7A H7A 109.5 . . ? 
C6A O6A H6A 109.5 . . ? 
O6A C6A C11A 118.2(2) . . ? 
O6A C6A C7A 121.9(2) . . ? 
C11A C6A C7A 119.9(2) . . ? 
O5A C7A C6A 117.7(2) . . ? 
O5A C7A C10A 122.0(2) . . ? 
C6A C7A C10A 120.4(2) . . ? 
C10A C8A C9A 119.3(2) . . ? 
C10A C8A H8A 120.4 . . ? 
C9A C8A H8A 120.4 . . ? 
C8A C9A C11A 121.1(2) . . ? 
C8A C9A C12A 119.4(2) . . ? 
C11A C9A C12A 119.4(2) . . ? 
O4A C10A C8A 125.1(2) . . ? 
O4A C10A C7A 115.0(2) . . ? 
C8A C10A C7A 119.9(2) . . ? 
C6A C11A C9A 119.5(2) . . ? 
C6A C11A H11A 120.3 . . ? 
C9A C11A H11A 120.3 . . ? 
O8A C12A O7A 122.2(2) . . ? 
O8A C12A C9A 121.2(2) . . ? 
O7A C12A C9A 116.7(2) . . ? 
H10A O10 H10B 85(7) . . ? 
 
loop_ 
 _geom_torsion_atom_site_label_1 
 _geom_torsion_atom_site_label_2 
 _geom_torsion_atom_site_label_3 
 _geom_torsion_atom_site_label_4 
 _geom_torsion 
 _geom_torsion_site_symmetry_1 
 _geom_torsion_site_symmetry_2 
 _geom_torsion_site_symmetry_3 
 _geom_torsion_site_symmetry_4 
 _geom_torsion_publ_flag 
C23 C19 C21 C25 0.3(4) . . . . ? 
N1 C19 C21 C25 -176.7(2) . . . . ? 
C23 C18 C22 C25 0.4(4) . . . . ? 
C28 C18 C22 C25 179.7(2) . . . . ? 
C22 C18 C23 C19 0.0(4) . . . . ? 
C28 C18 C23 C19 -179.4(2) . . . . ? 
C22 C18 C23 C29 -179.9(2) . . . . ? 
C28 C18 C23 C29 0.7(3) . . . . ? 
C21 C19 C23 C18 -0.4(3) . . . . ? 
N1 C19 C23 C18 176.7(2) . . . . ? 
C21 C19 C23 C29 179.5(2) . . . . ? 
N1 C19 C23 C29 -3.4(4) . . . . ? 
C26 N3 C24 O2 -169.6(3) . . . . ? 
C26 N3 C24 C30 6.6(4) . . . . ? 
C18 C22 C25 C21 -0.5(4) . . . . ? 
C19 C21 C25 C22 0.2(4) . . . . ? 
C24 N3 C26 O3 171.0(3) . . . . ? 
C24 N3 C26 C27 -8.8(4) . . . . ? 
O3 C26 C27 C31 158.7(3) . . . . ? 
N3 C26 C27 C31 -21.6(4) . . . . ? 
C30 N2 C28 O1 5.8(4) . . . . ? 
C29 N2 C28 O1 -179.7(3) . . . . ? 
C30 N2 C28 C18 -174.0(2) . . . . ? 
C29 N2 C28 C18 0.5(3) . . . . ? 
C23 C18 C28 O1 179.5(3) . . . . ? 
C22 C18 C28 O1 0.1(5) . . . . ? 
C23 C18 C28 N2 -0.7(3) . . . . ? 
C22 C18 C28 N2 179.9(2) . . . . ? 
C28 N2 C29 C23 -0.1(3) . . . . ? 
C30 N2 C29 C23 174.2(2) . . . . ? 
C18 C23 C29 N2 -0.3(3) . . . . ? 
C19 C23 C29 N2 179.7(2) . . . . ? 
C28 N2 C30 C31 -113.5(3) . . . . ? 
C29 N2 C30 C31 72.7(4) . . . . ? 
C28 N2 C30 C24 118.1(3) . . . . ? 
C29 N2 C30 C24 -55.7(4) . . . . ? 
O2 C24 C30 N2 -28.0(4) . . . . ? 
N3 C24 C30 N2 155.8(3) . . . . ? 
O2 C24 C30 C31 -157.7(3) . . . . ? 
N3 C24 C30 C31 26.1(4) . . . . ? 
N2 C30 C31 C27 178.8(3) . . . . ? 
C24 C30 C31 C27 -54.0(4) . . . . ? 
C26 C27 C31 C30 52.1(4) . . . . ? 
O6A C6A C7A O5A 0.1(3) . . . . ? 
C11A C6A C7A O5A -179.8(2) . . . . ? 
O6A C6A C7A C10A -178.7(2) . . . . ? 
C11A C6A C7A C10A 1.3(4) . . . . ? 
C10A C8A C9A C11A 0.9(4) . . . . ? 
C10A C8A C9A C12A 176.5(2) . . . . ? 
C9A C8A C10A O4A -178.8(2) . . . . ? 
C9A C8A C10A C7A 0.4(4) . . . . ? 
O5A C7A C10A O4A -1.0(3) . . . . ? 
C6A C7A C10A O4A 177.8(2) . . . . ? 
O5A C7A C10A C8A 179.6(2) . . . . ? 
C6A C7A C10A C8A -1.5(4) . . . . ? 
O6A C6A C11A C9A -179.9(2) . . . . ? 
C7A C6A C11A C9A 0.0(4) . . . . ? 
C8A C9A C11A C6A -1.1(4) . . . . ? 
C12A C9A C11A C6A -176.7(2) . . . . ? 
C8A C9A C12A O8A -7.3(4) . . . . ? 
C11A C9A C12A O8A 168.4(2) . . . . ? 
C8A C9A C12A O7A 174.2(2) . . . . ? 
C11A C9A C12A O7A -10.1(4) . . . . ? 
 
loop_ 
 _geom_hbond_atom_site_label_D 
 _geom_hbond_atom_site_label_H 
 _geom_hbond_atom_site_label_A 
 _geom_hbond_distance_DH 
 _geom_hbond_distance_HA 
 _geom_hbond_distance_DA 
 _geom_hbond_angle_DHA 
 _geom_hbond_site_symmetry_A 
N1 H1 O3  0.89(4) 2.11(4) 2.968(3) 161(3) 1_445 
N1 H2 O6A  0.91(4) 2.24(4) 3.041(3) 147(4) 1_444 
N3 H3 O5A  0.96(4) 2.02(4) 2.952(3) 165(3) 2_667 
O5A H5A O1  0.82 2.09 2.688(3) 130.0 . 
O7A H7A O8A  0.82 1.80 2.610(3) 172.2 2_788 
O6A H6A O10  0.82 1.95 2.722(3) 157.1 2_668 
O4A H4A N1  0.94(4) 1.86(4) 2.778(3) 165(4) 2_567 
O10 H10A O1  0.93(2) 1.91(2) 2.838(3) 175(5) . 
O10 H10B O8A  0.95(2) 2.31(7) 3.129(3) 144(9) 2_678 
 
_diffrn_measured_fraction_theta_max    0.978 
_diffrn_reflns_theta_full              63.61 
_diffrn_measured_fraction_theta_full   0.978 
_refine_diff_density_max    0.655 
_refine_diff_density_min   -0.374 
_refine_diff_density_rms    0.057 
